# Supplementary material for: Blowing snow contributions to the Arctic snow-on-sea ice budget using ICESat-2 observations
Source: Copernicus journal article supplement (doi:10.5194/egusphere-2026-9), 2026-01-20
Supplement: Supplementary file 1 [file egusphere-2026-9-supplement.pdf]

# **Blowing snow contributions to the Arctic snow-on-sea ice budget using ICESat-2 observations**

Joseph Robinson<sup>1</sup>, Lyatt Jaeglé<sup>1</sup>, Stephen P. Palm<sup>2,3</sup>, Glen E. Liston<sup>4</sup>

<sup>1</sup> Department of Atmospheric and Climate Science, University of Washington, Seattle, WA, USA

<sup>2</sup> Science Systems and Applications, Lanham, MD, USA

<sup>3</sup> NASA Goddard Space Flight Center, Greenbelt, MD, USA

<sup>4</sup> Cooperative Institute for Research in the Atmosphere (CIARA), Colorado State University, Fort Collins, CO, USA

## **Contents of this file**

Figures S1 to S9

## **Introduction**

The included support information provides additional figures contextualizing the main text, including smoothing of ICESat-2 observations to increase signal-to-noise (Figure S1) and the relative occurrence frequency of cloud attenuation as observed by ICESat-2 (Figure S2). The timeseries of monthly Arctic Oscillation (AO) index and ICESat-2 derived blowing snow occurrence is shown in Figure S3. Figure S4 shows 5-day rolling timeseries of the percent of all sea ice covered by each ICESat-2 grid cell label (blowing snow, mixed, clear air, cloud attenuated; see Section 2.5 of the main text). Figure S5 shows the spatial distribution of seasonal mean ICESat-2 and SnowModel-LG blowing snow burdens (mass per square meter). Meteorological conditions averaged across all (the 2021-2022) cold seasons are shown in Figure S6 (Figure S7). Figure S8 shows the daily amount of snowfall offset by blowing snow sublimation and Figure S9 shows the 2018-2023 mean blowing snow sublimation predicted by SnowModel-LG and DY2001 under all conditions (regardless of ICESat-2 data availability).

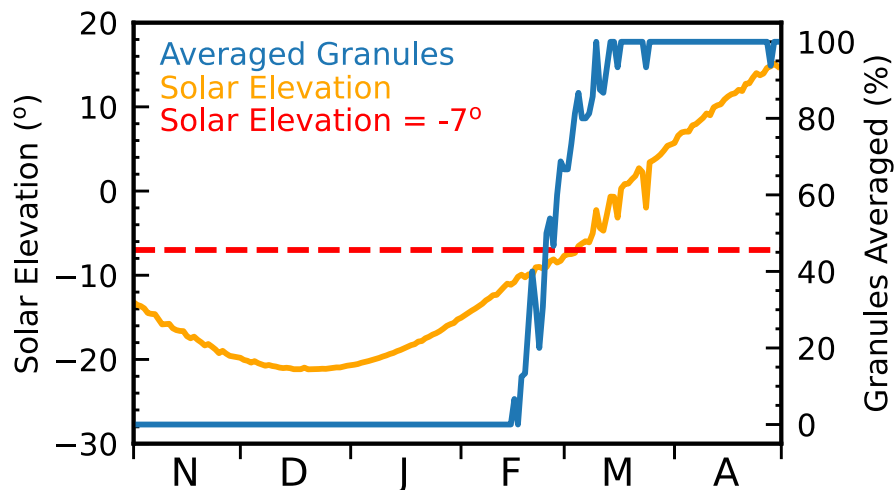

**Figure S1.** Characteristic cold season timeseries on the statistics of ICESat-2 data averaging from the native 280 m to 7 km along track. The average solar elevation is given in orange with the  $-7^\circ$  cutoff shown as a red dashed line. The blue line shows the percent of ICESat-2 granules that are horizontally averaged.

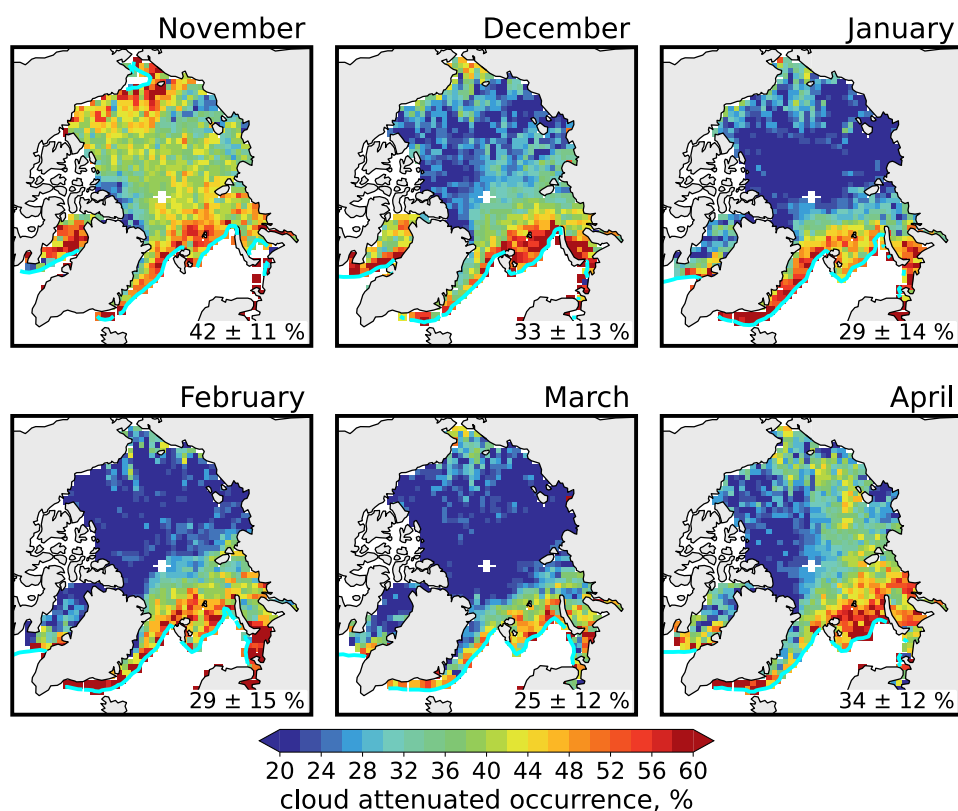

**Figure S2.** Monthly averaged cloud attenuated occurrence observed by ICESat-2 over the 2018-2023 cold seasons. The shading represents the percent of all ICESat-2 profiles in each grid box for which the surface could not be observed.

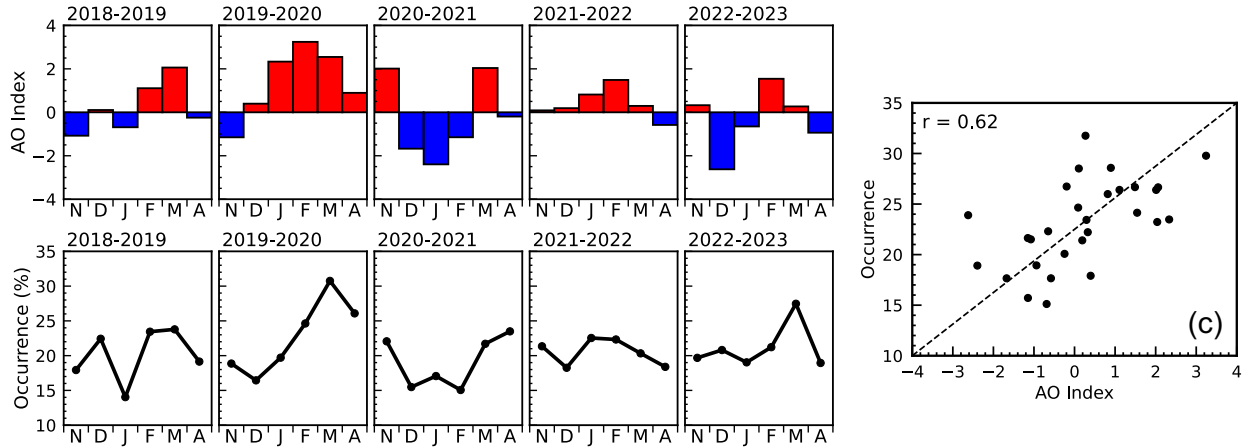

**Figure S3. (top row)** Monthly timeseries of the Arctic Oscillation index for the 2018-2023 cold seasons (accessed at [http://www.cpc.ncep.noaa.gov/products/precip/CWlink/daily\\_ao\\_index/monthly.ao.index.b50.current.ascii](http://www.cpc.ncep.noaa.gov/products/precip/CWlink/daily_ao_index/monthly.ao.index.b50.current.ascii)). **(bottom row)** Monthly timeseries of ICESat-2 derived blowing snow occurrence for the 2018-2023 cold seasons. **(c)** Correlation between monthly AO index (x-axis) and ICESat-2 monthly mean pan-Arctic blowing snow occurrence frequency (y-axis).

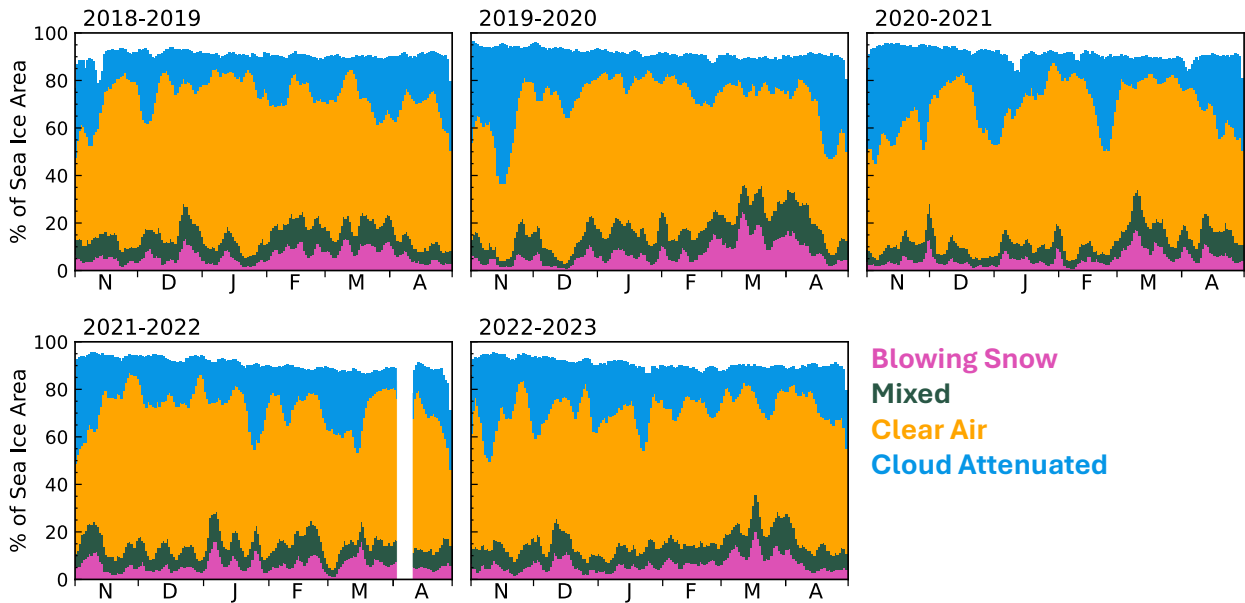

**Figure S4.** Timeseries of ICESat-2 observed grid cell labeled areas (in % of total sea ice area poleward of 65° N) for each individual cold season. The labelling is done using a 5-day running average of ICESat-2 profiles and each grid cell is labeled as blowing snow (magenta), mixed (green), clear air (orange), or cloud attenuated (blue) as described in Section 2.5.

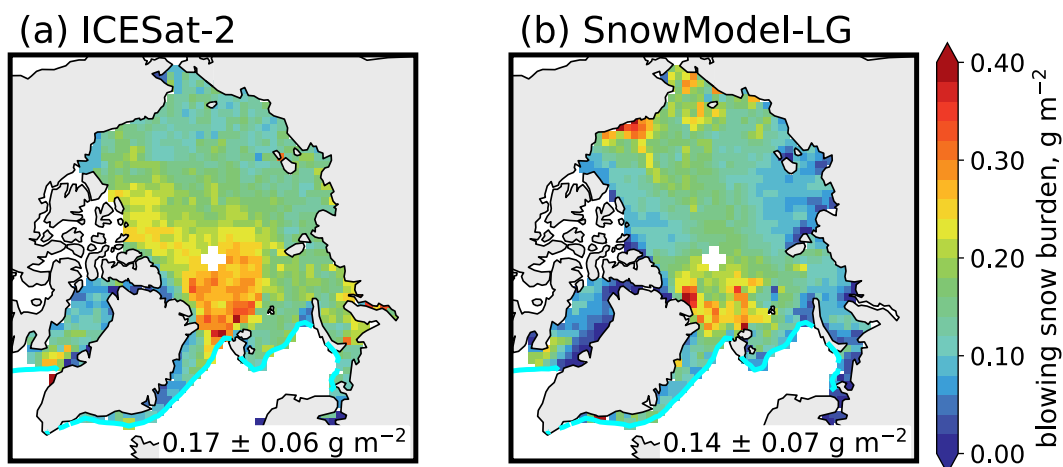

**Figure S5.** Seasonally averaged blowing snow mass burdens (units  $\text{g m}^{-2}$ ) over the 2018-2023 cold seasons from **(a)** ICESat-2 and **(b)** SnowModel-LG.

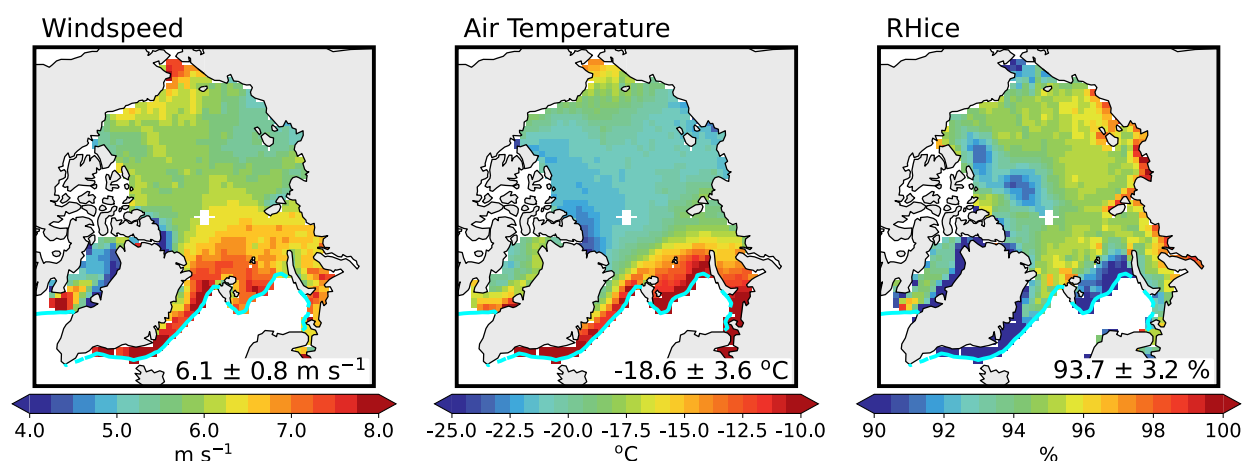

**Figure S6.** Seasonally averaged MERRA-2 meteorological conditions (10 m windspeed, 2 m air temperature, and 2 m relative humidity with respect to ice) over the 2018-2023 cold seasons. The fields are averaged regardless of whether ICESat-2 has available observations for a given grid cell on a given day.

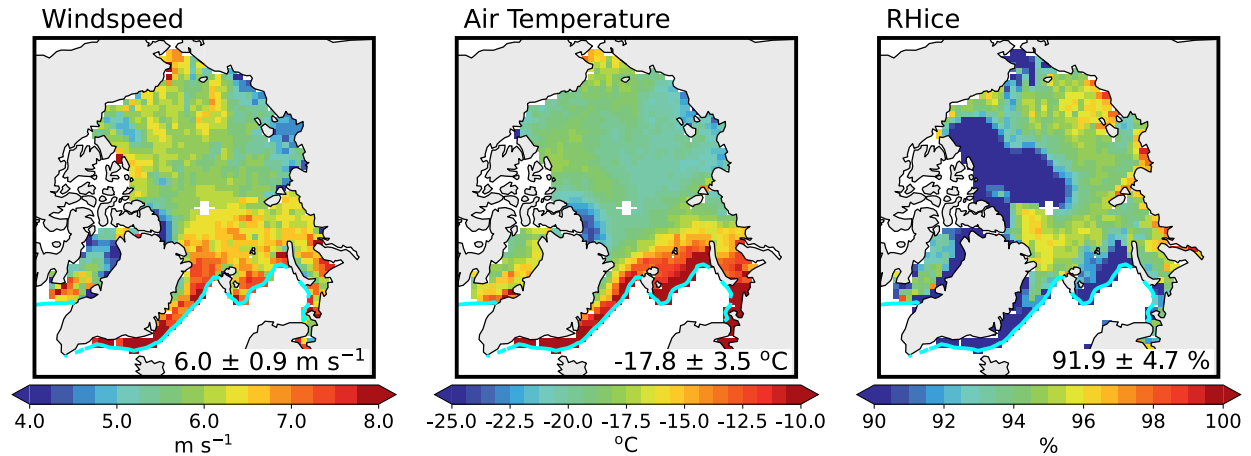

**Figure S7.** Seasonally averaged MERRA-2 meteorological conditions (10 m windspeed, 2 m air temperature, and 2 m relative humidity with respect to ice) for the 2021-2022 cold season. The fields are averaged regardless of whether ICESat-2 has available observations for a given grid cell on a given day.

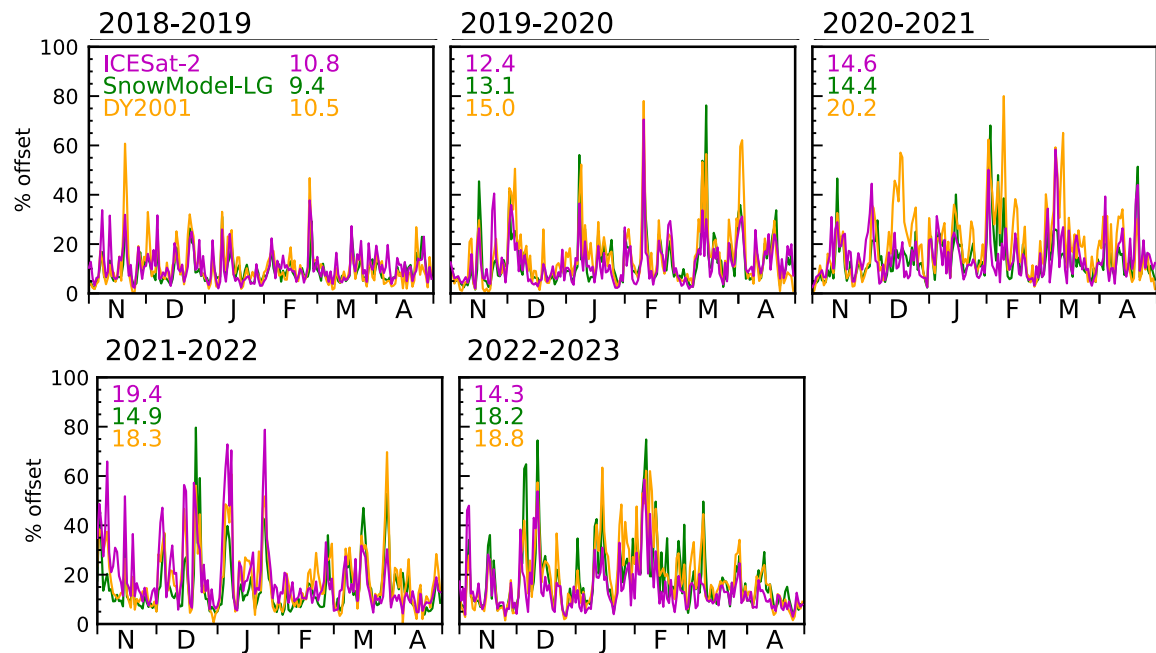

**Figure S8.** Timeseries of daily snowfall offset by blowing snow sublimation across the 2018-2023 Arctic cold seasons. Daily offsets (units %) are shown for ICESat-2 (magenta line), SnowModel-LG (green line), and DY2001 (orange line).

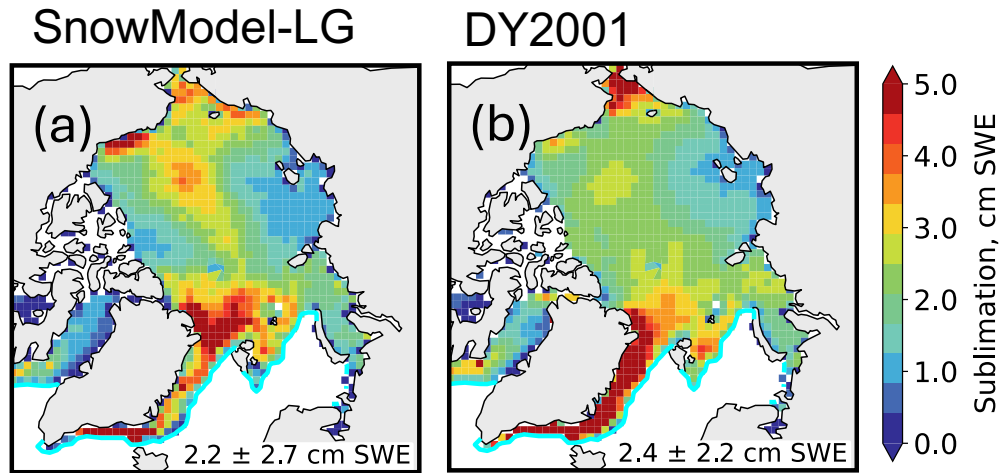

**Figure S9.** Spatial distribution of 2018-2023 all conditions blowing snow sublimation over Arctic sea ice predicted by **(a)** SnowModel-LG and **(b)** DY2001. All conditions means the SnowModel-LG and DY2001 results are analyzed regardless of whether ICESat-2 has available observations for a given grid cell on a given day. The bottom right of each panel shows the mean and standard deviation.
